# Supplementary material for: A facile strategy for crystal engineering of Cu2O polyhedrons with high-index facets
Source: Royal Society of Chemistry journal article supplement (doi:10.1039/c3ce26881k), 2013-01-01
Supplement: c3ce26881k.pdf [file c3ce26881k.pdf]

## Supporting Information

### Experiments section

In a typical synthesis, 100 mL of 0.01 M cupric sulfate ( $\text{CuSO}_4 \cdot 5\text{H}_2\text{O}$ ) aqueous solution was stirred at 60 °C for 10 min. Afterwards, sodium hydroxide (NaOH) solution (25 mL) with different concentrations was added dropwise to form a black suspension. After stirred for 5 min, 25 mL of 0.1M ascorbic acid solution was added to the suspension and stirred for another 1h at 60 °C. Finally, the brick-red product was washed thoroughly with deionized water by centrifugation and dried under vacuum for 6h.

The morphologies and the structures of the samples were characterized by scanning electron microscopy (SEM, S4800). X-ray powder diffraction (XRD, Rigaku D/max-2500 diffractometer with Cu  $K\alpha$  radiation,  $\lambda=0.1542\text{nm}$ , 40 kV, 100 mA).

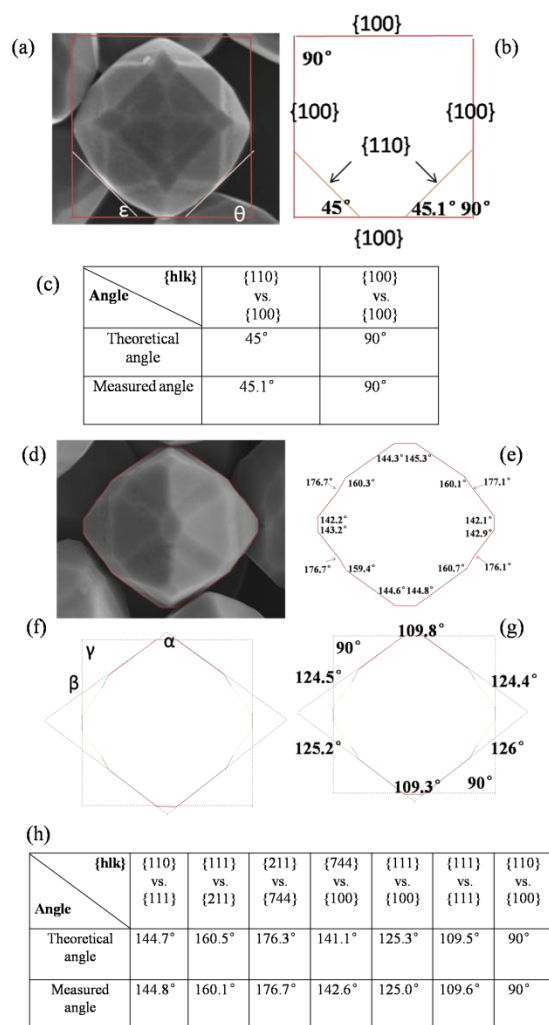

Fig. S1. (a) The SEM image of 74-facets  $\text{Cu}_2\text{O}$  crystal viewed along the  $\langle 100 \rangle$  direction,  $\angle\theta$  and  $\angle\varepsilon$  show the dihedral angle of  $\{100\}$  vs.  $\{100\}$  and  $\{100\}$  vs.  $\{110\}$  and corresponding measured values are shown in (b). (c and h) theoretical and measured values of dihedral angle of 74-facet  $\text{Cu}_2\text{O}$  crystal bounded by different facets. (d) The SEM image of 74-facets  $\text{Cu}_2\text{O}$  crystal viewed along the  $\langle 110 \rangle$  direction, (e) the solid represent the projected contour of the 74-facet  $\text{Cu}_2\text{O}$  polyhedron from  $\langle 110 \rangle$  direction, and the measured values of dihedral angle shown as black, (f) dotted ling represent the extension along the  $\langle 111 \rangle$ ,  $\langle 110 \rangle$  and  $\langle 100 \rangle$  direction;  $\angle\alpha$ ,  $\angle\beta$  and  $\angle\gamma$  represent the dihedral angle of  $\{111\}$  vs.  $\{111\}$ ,  $\{100\}$  vs.  $\{111\}$  and  $\{100\}$  vs.  $\{110\}$ , and corresponding measured values are shown in (g).

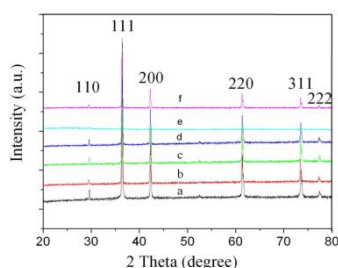

Fig. S2. XRD patterns of the prepared different morphology  $\text{Cu}_2\text{O}$  crystals. (a) cubes; (b) 18-facet  $\text{Cu}_2\text{O}$  polyhedrons; (c) 26-facet  $\text{Cu}_2\text{O}$  polyhedrons; (d) 50-facet  $\text{Cu}_2\text{O}$  polyhedrons with  $\{522\}$  high index facets; (e) 50-facet  $\text{Cu}_2\text{O}$  polyhedrons with  $\{211\}$  high index facets; (f) 72-facet  $\text{Cu}_2\text{O}$  polyhedrons.

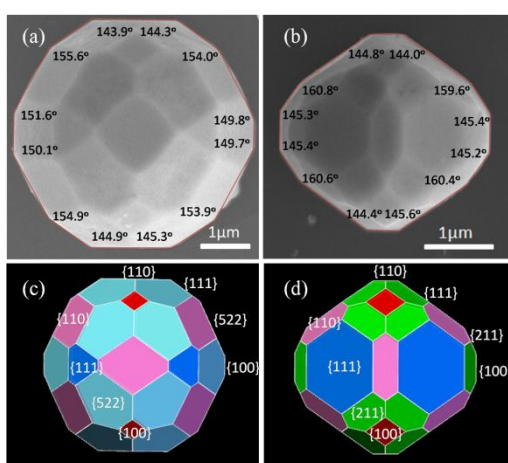

Fig. S3. The polyhedral  $\text{Cu}_2\text{O}$  crystals with different shapes and their corresponding simulated structures marked with the measured of dihedral angle. (a,c) 50-facet  $\text{Cu}_2\text{O}$  polyhedron with  $\{522\}$  facets ; (b,d) 50-facet  $\text{Cu}_2\text{O}$  polyhedron with  $\{211\}$  facets.

The Miller indices of exposed facets of the obtained two type 50-facet  $\text{Cu}_2\text{O}$  polyhedrons can be identify by Steno's law as depicted in follows:

As displayed in (Figure S3a and b ), dihedral angles between high-index facets and  $\{100\}$  facet of  $150.1^\circ$  (Figure S2a) and  $145.4^\circ$  (Figure S2b) are measured, respectively, which are in good agreement with the theoretical values of  $150.5^\circ$  and  $144.5^\circ$  between  $\{522\}$  vs.  $\{100\}$  and  $\{211\}$  vs.  $\{100\}$ . Moreover, the dihedral angles between high-index facets and  $\{111\}$  facet of  $154.9^\circ$  and  $160.4^\circ$  are also measured, respectively, which are in good agreement with the theoretical values of  $154.8^\circ$  and  $160.5^\circ$  between  $\{522\}$  vs.  $\{111\}$  and  $\{211\}$  vs.  $\{111\}$ . Therefore, it could be concluded that, exposed high-index facets in these two types of 50-facet  $\text{Cu}_2\text{O}$  polyhedron are  $\{522\}$  and  $\{211\}$ . In addition, the structural simulations of the two polyhedrons were also provided in Figure S2c and d, in which the high-index  $\{522\}$  and  $\{211\}$  facets are respectively marked in light blue and green.

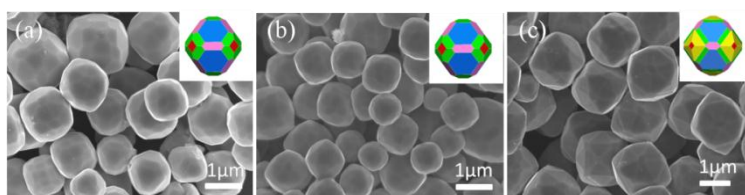

Fig. S4. SEM images and simulated structures of the products obtained using  $\text{CuCl}_2$ ,  $\text{Cu}(\text{CH}_3\text{COO})_2$  and  $\text{Cu}(\text{NO}_3)_2$  as copper ions sources when NaOH solution was set 9.5 M and otherwise the same reaction conditions. (a)  $\text{CuCl}_2$ ; (b)  $\text{Cu}(\text{CH}_3\text{COO})_2$ ; and (c)  $\text{Cu}(\text{NO}_3)_2$ .

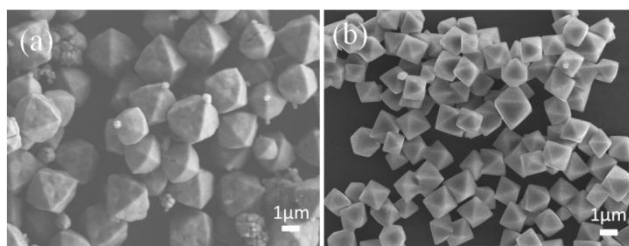

Fig. S5. SEM images of  $\text{Cu}_2\text{O}$  micro-crystals synthesized with different reducing agent when set NaOH solution at 9.5 M and otherwise the same reaction conditions. (a) D-(+)-glucose aqueous solution; (b)  $\text{N}_2\text{H}_4 \cdot \text{H}_2\text{O}$  aqueous solution.
